# Supplementary material for: Enhanced thermal stability and afterglow performance in Sr2Ga2−xAlxSiO7:Ce3+ phosphors via band gap tailoring
Source: Royal Society of Chemistry journal article supplement (doi:10.1039/d1qi01152a), 2021-11-10
Supplement: d1qi01152a1.pdf [file d1qi01152a1.pdf]

## Enhanced thermal stability and afterglow performance in $\text{Sr}_2\text{Ga}_{2-x}\text{Al}_x\text{SiO}_7:\text{Ce}^{3+}$ phosphors via band gap tailoring

Rongfu Zhou,<sup>a,\*</sup> Fengkai Ma,<sup>b</sup> Yunlin Yang,<sup>c</sup> Tingting Deng,<sup>a</sup> Jingwei Li,<sup>c</sup> Hongting Zhao,<sup>a</sup> Jie Sheng,<sup>a</sup> Qi Peng<sup>a</sup>

<sup>a</sup> School of Environmental and Chemical Engineering, Foshan University, Foshan 528225, P. R. China.

<sup>b</sup> Department of Optoelectronic Engineering, Jinan University, Guangzhou 510632, P. R. China.

<sup>c</sup> School of Chemical Engineering and Technology, Sun Yat-sen University, Zhuhai 519082, P. R. China.

\* E-mail: zhourongfu@fosu.edu.cn (R. Zhou).

### Contents

|                                                                         |    |
|-------------------------------------------------------------------------|----|
| Part A. The details of samples preparations and characterizations ..... | 2  |
| Preparation.....                                                        | 2  |
| Characterizations.....                                                  | 2  |
| References.....                                                         | 3  |
| Part B. Tables and Figures.....                                         | 4  |
| Table S1.....                                                           | 4  |
| Table S2.....                                                           | 5  |
| Table S3.....                                                           | 5  |
| Table S4.....                                                           | 6  |
| Table S5.....                                                           | 6  |
| Fig. S1.....                                                            | 7  |
| Fig. S2.....                                                            | 8  |
| Fig. S3.....                                                            | 9  |
| Fig. S4.....                                                            | 10 |

|              |    |
|--------------|----|
| Fig. S5..... | 11 |
| Fig. S6..... | 12 |

**PART A. THE DETAILS OF SAMPLES PREPARATIONS AND CHARACTERIZATIONS**

**Preparation.** The reagents SrCO<sub>3</sub> (99.5%, Aladdin), Ga<sub>2</sub>O<sub>3</sub> (99.99%, Aladdin), Al<sub>2</sub>O<sub>3</sub> (99.99%, Shanghai Siyu Chemical Technology Co., LTD), SiO<sub>2</sub> (99.99%, Aladdin), Na<sub>2</sub>CO<sub>3</sub> (99.99%, Aladdin), H<sub>3</sub>BO<sub>3</sub> and rare-earth oxides CeO<sub>2</sub> (99.99%, Aladdin) and Eu<sub>2</sub>O<sub>3</sub> (99.99%, Shanghai Siyu Chemical Technology Co., LTD) were used as starting materials. The raw materials are weighed with the nominal formulas Sr<sub>1.98</sub>Ce<sub>0.01</sub>Na<sub>0.01</sub>Ga<sub>2-x</sub>Al<sub>x</sub>SiO<sub>7</sub> and Sr<sub>1.98</sub>Eu<sub>0.01</sub>Na<sub>0.01</sub>Ga<sub>2-x</sub>Al<sub>x</sub>SiO<sub>7</sub> (x = 0.8, 1.2, 1.6, 1.8, 1.9 and 2) for Ce<sup>3+</sup> and Eu<sup>3+</sup> singly doped samples, respectively. In addition, about 5% H<sub>3</sub>BO<sub>3</sub> was added as flux. Na<sup>+</sup> ions act as charge compensations in the samples preparations since two Sr<sup>2+</sup> were replaced by one Ce<sup>3+</sup> and one Na<sup>+</sup>. The mixtures were ground thoroughly in an agate mortar, and then moved to alumina crucibles. Eu<sup>3+</sup> doped Sr<sub>2</sub>Ga<sub>2-x</sub>Al<sub>x</sub>SiO<sub>7</sub> samples were pre-fired at 973 K in air atmosphere for 5 h, and annealed at 1623 K for 3 h in air ambience with the x content increases from 0.8 to 1.2, 1.6, 1.8, 1.9 and 2. For Ce<sup>3+</sup> doped Sr<sub>2</sub>Ga<sub>2-x</sub>Al<sub>x</sub>SiO<sub>7</sub> samples, the annealed temperature and time were set as the same as that of Eu<sup>3+</sup> doped samples, but the annealed ambience was carbonic oxide (CO) which was produced from the incomplete combustion of carbon at high temperature. After cooling down to room temperature, the final products were ground into powders for subsequent analyses.

**Characterizations.** The phase purity of the synthetic samples was estimated by powder X-ray diffraction (P-XRD) on the Bruker D8 advanced X-ray diffractometer at 40 kV and 40 mA. The P-XRD data for refinement was collected with the 2θ range from 5° to 110° and 2θ step of 0.02°. The Rietveld refinement was performed using the TOPAS - Academic program.<sup>1</sup> The TL curves of 300-500 K were performed at the SL18 TL&OSL Reader (Guangzhou-Radiation Science and Technology Co., Ltd) equipped with R928 PMT of Hamamatsu. The samples were weighed about 100 mg on a metal

disc of 10 mm diameter. A mercury lamp (254 nm) of 8 W was used as the light source to charging samples for five min in the TL measurements. The Wavelength-resolved (3D) thermoluminescence (TL) emission spectra and thermoluminescence (TL) curves of 100-310 K were recorded by TOSL-3DS Spectrometer (Guangzhou-Radiation Science and Technology) with a CCD detector (Ocean Optics QE65 Pro).<sup>2</sup> For recording the decay curves of Ce<sup>3+</sup> persistent luminescence, the measurements were performed in the Edinburgh FLS 1000 model spectrometer. The powder samples of Sr<sub>1.98</sub>Ce<sub>0.01</sub>Na<sub>0.01</sub>Ga<sub>2-x</sub>Al<sub>x</sub>SiO<sub>7</sub> were filled in a sample cell with quartz window (20 mm diameter), and the 1060 nm laser (Changchun Laser Optoelectronics Technology, MW-GX-1060-1000 mW) were used as the photostimulated sources with the operation of 700 mA (0.248 W). The radiation density of laser received by the samples was calculated to be about 0.79 mW/mm<sup>2</sup>. The monitoring wavelength of decay curves of persistent luminescence was at 400 nm. The X-ray photoelectron spectroscopy was performed on a Thermo Fisher Scientific K-Alpha with the monochromatic Al-K $\alpha$  source ( $h\nu = 1486.8$  eV) operated at 15 kV and 10 mA.

The excitation and emission spectra in the VUV-UV range were recorded on the 4B8 beamline of the Beijing Synchrotron Radiation Facility (BSRF).<sup>3</sup> The UV-vis excitation and emission spectra and luminescence decay curves at room temperature (RT) were recorded on an Edinburgh FLS 1000 model spectrometer which was a combined fluorescence lifetime and steady-state, equipped with a cooled housing (-20 °C) photomultiplier PMT-900. The 450 W Xenon lamp was used as the excitation source of steady-state excitation and emission spectra. A 150 W nF900 lamp with a pulse width of 1 ns and pulse repetition rate of 40 kHz was used for the measurements of decay curves. The temperature-dependent spectral measurements in the 77–500 K range were performed by mounting the samples in an Oxford cryostat.

## References

- 1 A. A. Coelho. TOPAS Academic, Ver. 4; Coelho Software: Brisbane, Australia, 2007.

2 H. M. Tang, L. T. Lin, C. X. Zhang, and Q. Tang. High-sensitivity and wide-linear-range thermoluminescence dosimeter LiMgPO<sub>4</sub>: Tm, Tb, B for detecting high-dose radiation. *Inorg. Chem.*, 2019, **58**, 9698-9705.

3 Y. Tao, Y. Huang, Z. Gao, H. Zhuang, A. Zhou, Y. Tan, D. Li, and S. Sun. Developing VUV spectroscopy for protein folding and material luminescence on beamline 4B8 at the Beijing Synchrotron Radiation Facility. *J. Synchrot. Radiat.*, 2009, **16**, 857-863.

## PART B. TABLES AND FIGURES

**Table S1.** Final Refined Structural Parameters of Sr<sub>2</sub>Ga<sub>2</sub>SiO<sub>7</sub><sup>h</sup> Host.

| Atom | Wyckoff position | x        | y        | z        | Occ. | B <sub>iso</sub> |
|------|------------------|----------|----------|----------|------|------------------|
| Sr   | 4e               | 0.338(2) | 0.161(8) | 0.509(4) | 1    | 1.79(6)          |
| Ga1  | 2a               | 0        | 0        | 0        | 1    | 1.72(3)          |
| Ga2  | 4e               | 0.141(3) | 0.358(7) | 0.962(0) | 0.5  | 1.62(6)          |
| Si   | 4e               | 0.141(3) | 0.358(7) | 0.962(0) | 0.5  | 1.62(6)          |
| O1   | 2c               | 1/2      | 0        | 0.160(2) | 1    | 2.36(4)          |
| O2   | 4e               | 0.141(9) | 0.358(1) | 0.273(5) | 1    | 2.27(2)          |
| O3   | 8f               | 0.083(9) | 0.171(1) | 0.822(1) | 1    | 2.05(3)          |

<sup>h</sup>Symmetry: tetragonal; space group:  $P\bar{4}2_1m$ ; lattice parameters:  $a = b = 7.9541(4)$  Å,  $c = 5.3185(7)$  Å,  $V = 336.49(7)$  Å<sup>3</sup>,  $\alpha = \beta = \gamma = 90^\circ$  and  $Z = 2$ ; reliability factors:  $R_{wp} = 6.71\%$ ,  $R_p = 4.55\%$  and  $R_B = 4.41\%$ .

**Table S2.** Distances (Å) of Sr<sup>2+</sup>-O<sup>2-</sup> in Sr<sub>2</sub>Ga<sub>2</sub>SiO<sub>7</sub> Sample.

| Bonds      | Distances (Å) |
|------------|---------------|
| Sr-O1      | 2.600         |
| Sr-O2      | 2.540         |
| Sr-O2 (x2) | 2.682         |
| Sr-O3 (x2) | 2.620         |
| Sr-O3 (x2) | 2.949         |
| Average    | 2.705         |

**Table S3.** Lattice Parameters (*a*, *b*, *c* and *V*) of Sr<sub>1.98</sub>Ce<sub>0.01</sub>Na<sub>0.01</sub>Ga<sub>2-x</sub>Al<sub>x</sub>SiO<sub>7</sub> (*x* = 0.8, 1.2, 1.6, 1.8, 1.9 and 2) Samples.

| <i>x</i> | <i>a</i> / <i>b</i> (Å) | <i>c</i> | <i>V</i> |
|----------|-------------------------|----------|----------|
| 0.8      | 7.9099                  | 5.3043   | 331.87   |
| 1.2      | 7.8840                  | 5.2953   | 329.14   |
| 1.6      | 7.8597                  | 5.2869   | 326.60   |
| 1.8      | 7.8427                  | 5.2800   | 324.76   |
| 1.9      | 7.8359                  | 5.2779   | 324.07   |
| 2        | 7.8323                  | 5.2738   | 323.52   |

**Table S4.** Bond Distances (Å) of Sr<sup>2+</sup> (Ce<sup>3+</sup>)-O<sup>2-</sup> in Sr<sub>2</sub>Ga<sub>2-x</sub>Al<sub>x</sub>SiO<sub>7</sub>:Ce<sup>3+</sup> (*x* = 0.8, 1.2, 1.6, 1.8, 1.9 and 2) Samples.

| Bonds      | x = 0.8 | x = 1.2 | x = 1.6 | x = 1.8 | x = 1.9 | x = 2 |
|------------|---------|---------|---------|---------|---------|-------|
| Sr-O1      | 2.590   | 2.583   | 2.577   | 2.573   | 2.571   | 2.570 |
| Sr-O2      | 2.527   | 2.520   | 2.513   | 2.508   | 2.506   | 2.505 |
| Sr-O2 (x2) | 2.669   | 2.661   | 2.653   | 2.648   | 2.646   | 2.644 |
| Sr-O3 (x2) | 2.608   | 2.601   | 2.595   | 2.590   | 2.588   | 2.587 |
| Sr-O3 (x2) | 2.935   | 2.927   | 2.920   | 2.914   | 2.912   | 2.911 |
| Average    | 2.693   | 2.685   | 2.678   | 2.673   | 2.671   | 2.670 |

**Table S5.** Calculated energies of traps based on the temperature-dependent TL curves.

| Temperature (K) | Trap energy (eV) |
|-----------------|------------------|
| 100             | 0.054            |
| 130             | 0.066            |
| 160             | 0.081            |
| 190             | 0.13             |
| 210             | 0.14             |
| 230             | 0.15             |
| 250             | 0.22             |
| 280             | 0.22             |
| 310             | 0.39             |
| 325             | 0.54             |

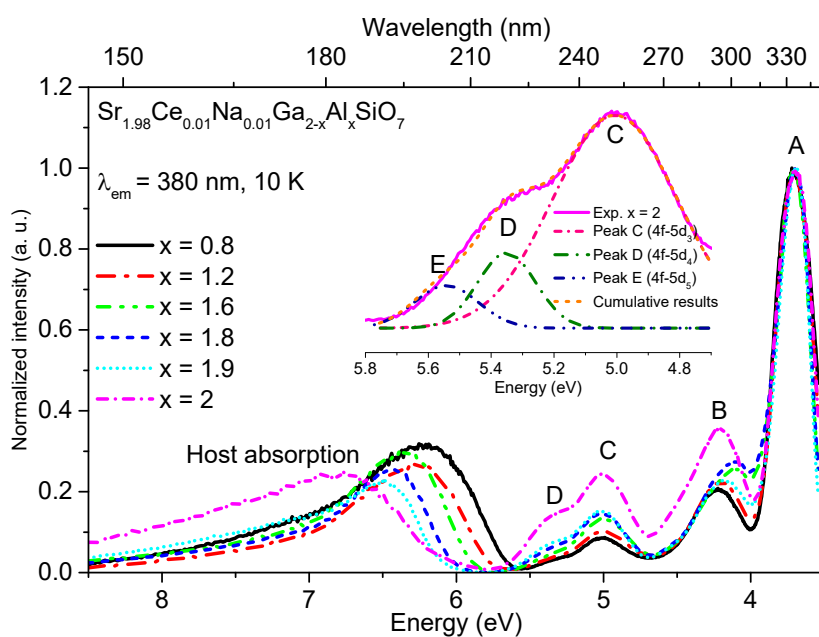

**Fig. S1** Highest-height normalized synchrotron radiation VUV-UV excitation ( $\lambda_{\text{em}} = 380$  nm, 10 K) spectra of  $\text{Sr}_{1.98}\text{Ce}_{0.01}\text{Na}_{0.01}\text{Ga}_{2-x}\text{Al}_x\text{SiO}_7$  ( $x = 0.8, 1.2, 1.6, 1.8, 1.9$  and  $2$ ) samples; the inset shows Gaussian fitting results of excitation spectrum (4.7-5.8 eV) of representative  $\text{Sr}_{1.98}\text{Ce}_{0.01}\text{Na}_{0.01}\text{Al}_2\text{SiO}_7$  sample.

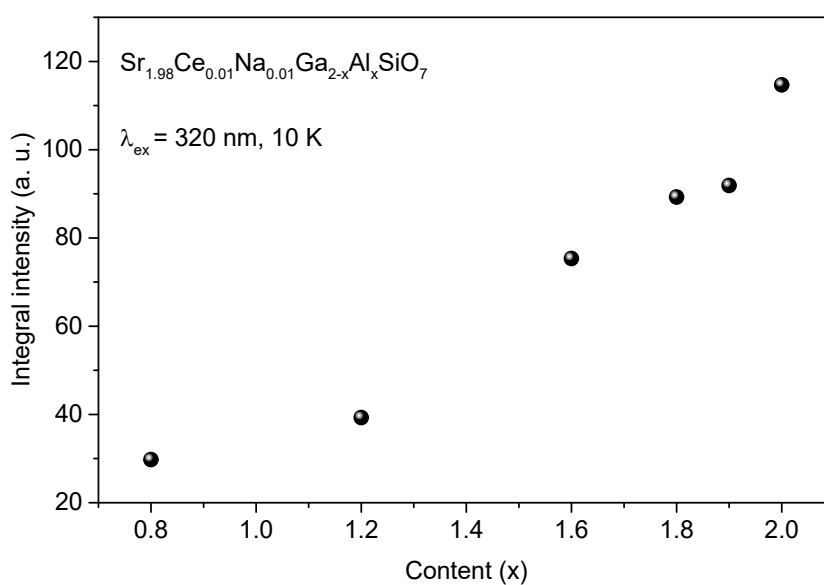

**Fig. S2** Integral intensity of  $\text{Ce}^{3+}$  emission ( $\lambda_{\text{ex}} = 320 \text{ nm}$ , 10 K) in  $\text{Sr}_{1.98}\text{Ce}_{0.01}\text{Na}_{0.01}\text{Ga}_{2-x}\text{Al}_x\text{SiO}_7$  ( $x = 0.8, 1.2, 1.6, 1.8, 1.9$  and  $2$ ) samples.

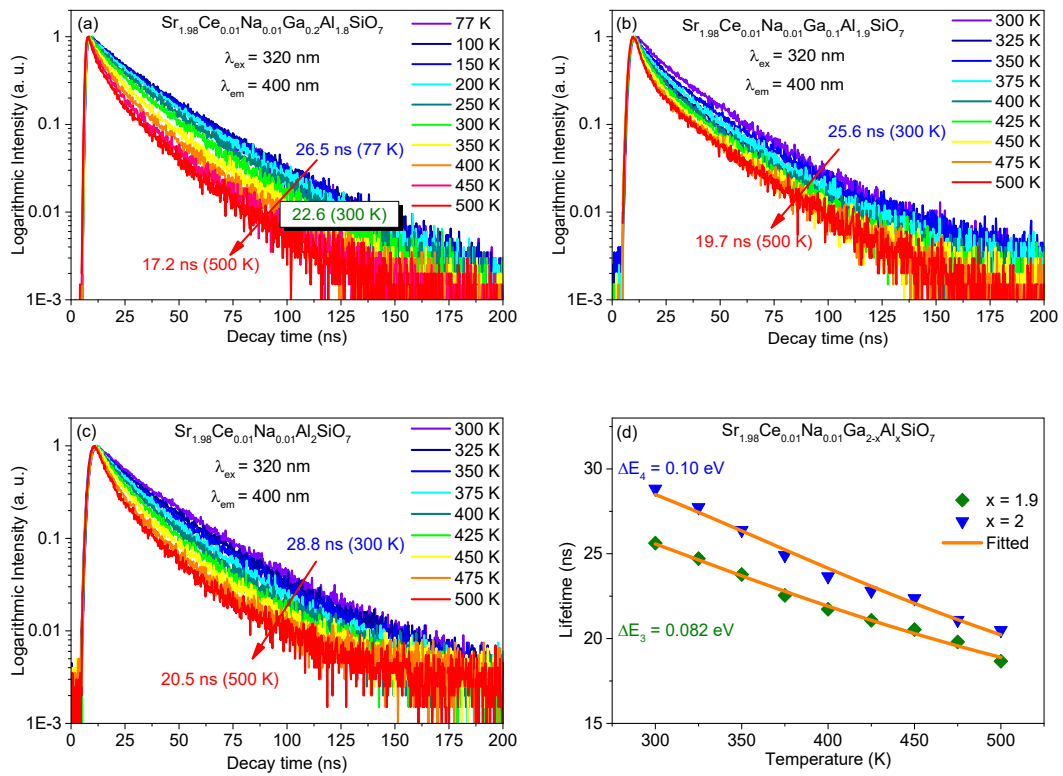



**Fig. S3** (a-c) Temperature-dependent decay curves ( $\lambda_{\text{ex}} = 320$  nm,  $\lambda_{\text{em}} = 400$  nm) of  $\text{Sr}_{1.98}\text{Ce}_{0.01}\text{Na}_{0.01}\text{Ga}_{2-x}\text{Al}_x\text{SiO}_7$  (a,  $x = 1.8$ ; b,  $x = 1.9$ ; c,  $x = 2$ ) samples; (d) lifetimes of  $\text{Ce}^{3+}$  in  $\text{Sr}_{1.98}\text{Ce}_{0.01}\text{Na}_{0.01}\text{Ga}_{2-x}\text{Al}_x\text{SiO}_7$  ( $x = 1.9$  and 2) samples as a function of temperature and the corresponding fitting results.

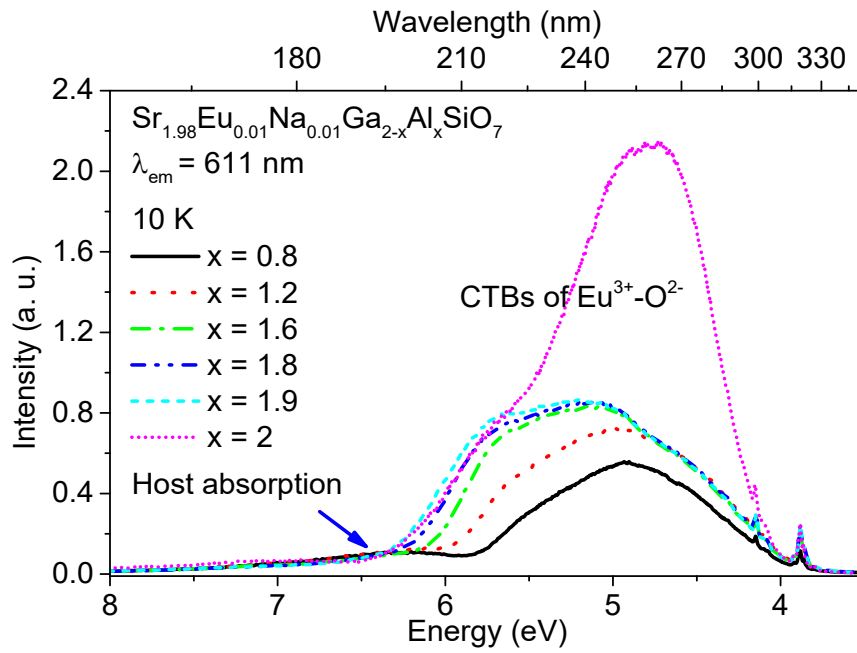

**Fig. S4** Synchrotron radiation VUV-UV excitation ( $\lambda_{\text{em}} = 611$  nm, 10 K) spectra of  $\text{Eu}^{3+}$  in  $\text{Sr}_{1.98}\text{Eu}_{0.01}\text{Na}_{0.01}\text{Ga}_{2-x}\text{Al}_x\text{SiO}_7$  ( $x = 0.8, 1.2, 1.6, 1.8, 1.9$  and 2) samples.

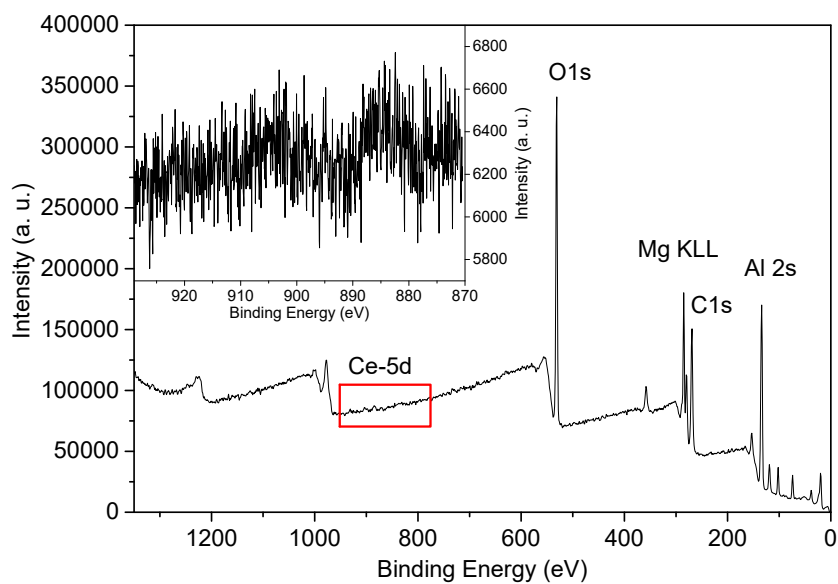

**Fig. S5** X-ray photoelectron spectroscopy of  $\text{Sr}_{1.98}\text{Ce}_{0.01}\text{Na}_{0.01}\text{Al}_2\text{SiO}_7$  sample, the inset shows the enlarged range of 870-930 eV.

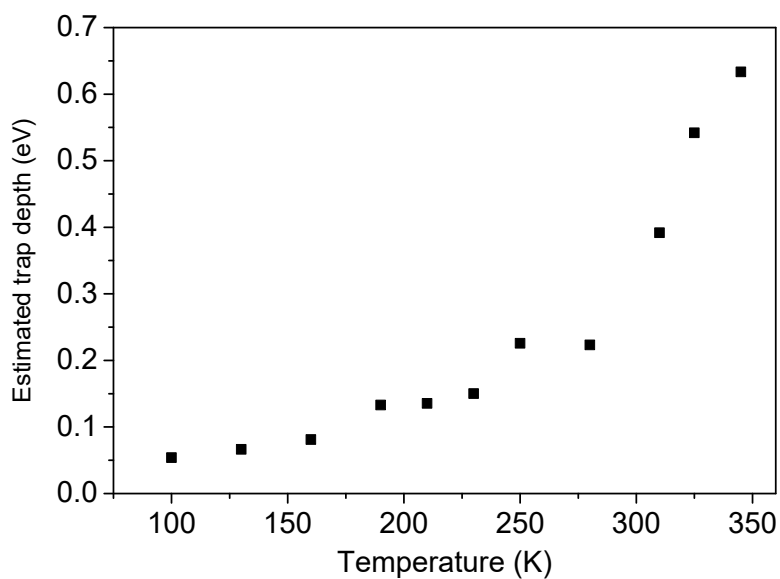

**Fig. S6** Estimated trap depths as a function of excitation temperature ( $T_{\text{exc}} = 100\text{-}350$  K) in  $\text{Sr}_{1.98}\text{Ce}_{0.01}\text{Na}_{0.01}\text{Al}_2\text{SiO}_7$  sample.

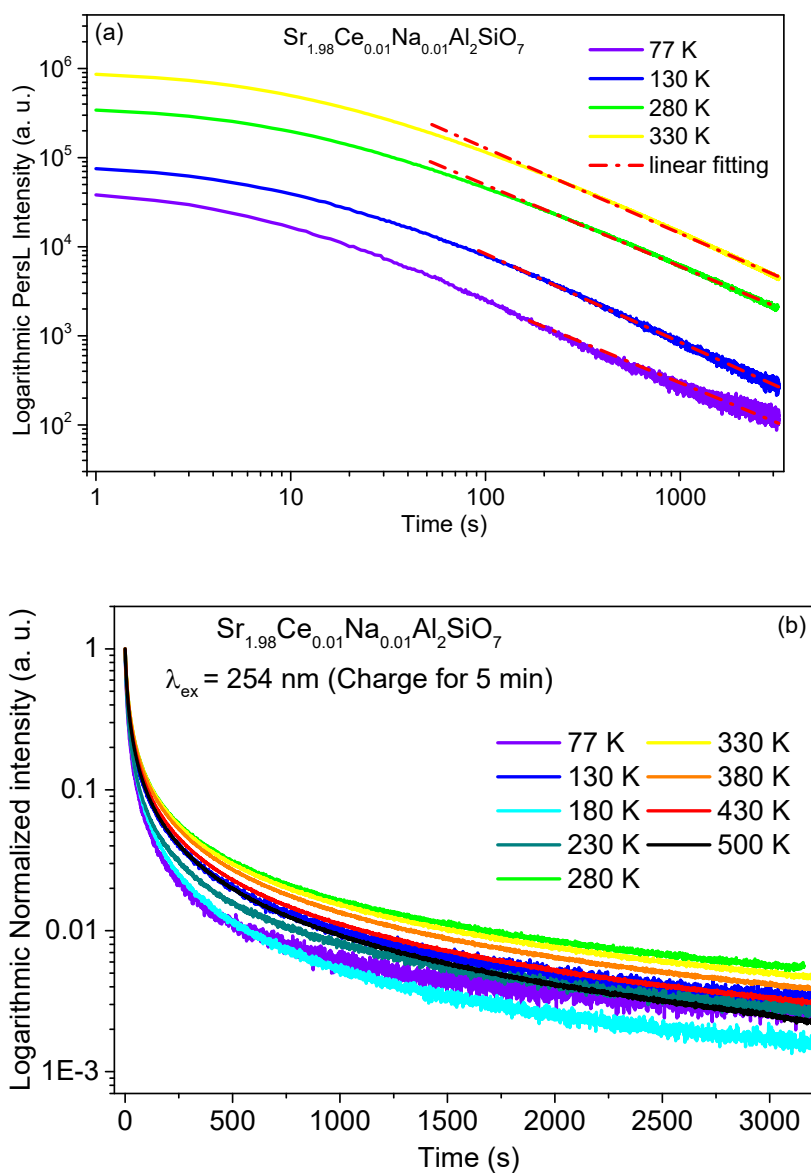

**Fig. S7** (a) PersL decay curves ( $T_{\text{exc}} = 77, 130, 230$  and  $330$  K) of  $\text{Sr}_{1.98}\text{Ce}_{0.01}\text{Na}_{0.01}\text{Al}_2\text{SiO}_7$  sample and corresponding fitting results; (b) Normalized temperature-dependent PersL decay curves ( $\lambda_{\text{ex}} = 254$  nm Hg lamp,  $\lambda_{\text{em}} = 400$  nm) of  $\text{Sr}_{1.98}\text{Ce}_{0.01}\text{Na}_{0.01}\text{Al}_2\text{SiO}_7$  sample.
